# Supplementary material
Source: Research Square preprint supplement (doi:10.21203/rs.3.rs-9402334/v1)
Supplement: Supplementary file 1 [file c9081bb9418125861f2ed963.xlsx]

## Sheet: Supp. table 1
Supplementary Table 1. Binary matrix of morphological characters according to specimens. Male pedipalpus characters are absent in female, and female epigyne characters are absent in male specimens
Specimen code	Carapace anteriorly narrowed; eyes distinctly protruding.	Posterior median eyes (PME) round.	Posterior median eyes (PME) oval.	Lateral eyes contiguous and round.	Lateral eyes separated by approximately half their diameter; surrounded by a black ring.	Two contiguous lateral eyes, round, with black rings.	PME separated by approximately the length of the foveal line.	PME symmetrically black-ringed at the distal fork of the fovea.	PME round, separated by approximately half their diameter.	Fovea with dashed pattern.	Fovea thickened and bifurcate posteriorly.	Fovea with long paired longitudinal lines near PME.	Fovea with short paired longitudinal lines near PME.	Foveal paired lines distinct near anterior median eyes (AME).	Foveal pattern bifurcating toward lateral regions of the carapace.	Fovea dark brownish.	Foveal paired lines faint near PME.	Fovea dark brown extending to ocular area.	Fovea originating dark at pedicel region, becoming light brown toward ocular area.	Fovea forming a thin longitudinal stripe.	Fovea light brown.	Lateral carapace stripe dark.	Lateral carapace stripe light.	Lateral carapace stripe broad.	Lateral carapace stripe grading from dark posteriorly to lighter anteriorly.	Lateral carapace stripe discontinuous.	Lateral carapace stripe narrow.	Dense white setae surrounding ocular area.	Sparse white setae surrounding ocular area.	Sternum subcircular.	Sternum oval.	Sternum goblet-shaped.	Sternum goblet-shaped with oval anterior portion.	Sternum goblet-shaped with broad anterior portion.	First two dorsal abdominal segments lacking zigzag pattern.	Zigzag abdominal pattern closely spaced.	Zigzag abdominal pattern widely spaced.	First three zigzag bands broad; remaining bands closely arranged.	Zigzag pattern dark brown.	Zigzag pattern with dark brown apices.	Zigzag pattern blackish brown.	Zigzag pattern yellowish brown.	Zigzag pattern light brown.	Central portion of zigzag bands dark brown.	First zigzag band separate; subsequent bands connected.	Zigzag bands not interconnected.	Apices of zigzag bands separated.	Apices of zigzag bands fused.	Ventral abdomen with yellowish-white longitudinal stripes laterally.
ANA154	0	0	1	0	1	0	1	1	0	0	1	1	0	1	0	0	0	1	0	0	0	1	0	1	0	0	0	0	1	1	0	0	0	0	0	0	1	0	0	0	1	0	0	0	0	0	0	1	0
ANA156	0	1	0	1	0	1	1	1	0	0	0	1	0	0	0	0	1	1	0	0	0	1	1	0	0	0	1	1	0	1	0	0	0	0	0	0	1	0	0	0	1	0	0	0	0	0	0	1	1
SNA157	0	1	0	1	0	0	1	1	0	0	0	1	0	1	0	0	0	0	1	0	0	1	0	1	1	0	0	1	0	0	0	1	0	0	0	0	1	0	0	0	1	0	0	0	0	0	0	1	1
ANA158	0	0	1	0	1	1	1	1	0	0	0	1	0	1	0	0	0	0	1	0	0	1	0	1	0	1	0	1	0	0	1	0	0	0	0	0	1	0	0	1	0	0	0	0	0	0	0	1	1
SİNA159	0	0	1	1	0	0	1	1	0	0	1	1	0	1	0	0	0	1	0	0	0	0	1	1	0	0	0	1	0	0	1	0	0	0	0	0	0	1	0	1	0	0	0	0	0	0	0	1	0
SİNA160	0	1	0	0	1	1	1	1	1	0	1	1	0	1	0	0	0	0	1	0	0	1	0	1	0	0	0	1	0	0	0	1	1	0	0	0	0	1	1	0	0	0	0	0	0	0	0	1	1
SNA161	0	1	0	1	0	1	1	1	0	1	1	1	0	1	0	1	0	0	0	0	0	1	0	0	0	0	1	1	0	0	0	1	0	0	0	0	1	0	0	0	1	0	0	0	0	0	0	1	1
SNA162	0	1	0	0	1	0	0	1	1	0	1	1	0	1	0	1	0	0	0	0	0	0	1	1	0	0	0	1	0	0	1	0	0	0	1	1	0	1	1	1	0	0	0	1	0	0	1	0	0
SNA164	0	0	1	0	0	1	1	1	1	0	1	1	0	1	0	1	0	0	0	0	0	1	0	1	0	0	0	1	0	0	0	1	1	0	0	0	1	1	1	1	0	0	0	0	0	1	0	1	1
SNA166	0	1	0	1	0	1	0	1	1	0	1	1	0	1	1	0	0	0	0	0	1	0	1	1	0	0	0	1	0	0	1	0	0	0	0	0	0	1	0	0	0	0	0	1	0	0	0	1	0
SİNA167	0	1	0	1	0	1	1	1	1	0	1	1	0	1	0	1	0	0	0	0	0	1	0	1	0	0	0	1	0	0	0	1	1	0	0	0	1	0	0	1	0	0	0	0	1	0	0	1	1
ANA168	0	0	1	0	0	1	1	1	1	0	0	1	0	0	0	1	1	0	0	0	0	1	0	1	1	0	0	1	0	0	0	1	1	0	0	1	1	0	0	1	0	0	0	0	0	0	0	1	1
SNA169	0	1	0	0	0	1	1	1	0	0	1	0	1	1	0	0	0	0	0	0	1	1	0	1	0	0	0	1	0	0	1	0	0	0	1	0	0	1	0	1	0	0	0	0	1	0	0	1	0
SNA170	0	1	0	1	0	1	0	1	0	0	1	0	1	1	0	1	0	0	1	0	0	1	0	1	0	0	0	1	0	0	0	1	0	1	1	0	0	1	0	1	0	0	0	0	1	1	0	1	0
SNA171	0	1	0	0	1	0	1	1	0	0	1	1	0	0	0	0	1	0	0	0	1	0	0	1	1	0	0	0	1	1	0	0	0	0	1	0	0	1	0	0	0	0	0	1	0	0	0	1	0
SİNA172	0	1	0	1	0	1	1	1	0	0	0	0	1	0	0	1	1	1	0	0	0	1	0	0	0	0	1	1	0	1	0	0	0	0	0	0	0	1	1	0	0	0	0	0	1	0	0	1	1
SİNA173	0	0	1	1	0	0	1	1	0	0	1	1	0	0	0	0	1	1	0	1	0	1	0	0	0	1	1	1	0	0	0	1	0	1	0	0	0	1	0	0	1	0	0	0	1	0	0	1	1
SNB174	0	1	0	0	1	0	1	1	1	0	1	0	1	1	1	0	0	1	0	0	0	1	0	1	0	0	0	1	0	0	0	1	0	1	1	1	0	0	0	0	0	0	0	1	0	1	1	1	0
ANA175	0	1	0	0	1	0	1	1	0	0	0	1	0	1	0	1	0	0	0	1	0	1	0	1	0	0	0	0	1	1	0	0	0	0	0	0	0	1	0	0	1	0	0	0	1	1	0	1	1
SNA177	0	1	0	1	0	1	0	1	1	0	0	0	1	1	1	1	0	1	0	0	0	1	0	1	0	0	0	0	1	0	0	1	0	1	0	1	0	1	0	0	0	0	1	1	0	0	0	1	0
SNA178	0	0	1	0	0	0	1	1	1	0	0	0	1	0	0	1	1	0	0	0	0	1	1	1	0	0	0	1	0	0	1	0	0	0	0	1	0	1	0	0	0	1	0	2	1	0	0	1	1
SİNA179	1	0	1	1	0	1	0	1	0	0	0	1	0	1	0	1	0	0	1	1	0	0	1	0	0	0	1	1	0	0	0	1	0	1	0	0	0	1	0	0	1	0	0	0	1	0	0	1	1
NNA119	0	1	0	0	1	0	0	0	1	0	0	0	0	0	0	0	1	0	0	0	1	0	1	0	0	0	1	1	0	0	0	0	1	0	0	0	0	1	0	0	0	0	1	0	1	0	0	1	0
NNA118	1	1	0	0	0	1	1	1	0	0	0	0	1	0	0	0	1	0	0	0	1	0	1	0	0	0	0	1	0	0	1	0	0	0	0	0	0	1	0	0	0	0	1	1	1	0	1	1	0
ÇNB20	0	1	0	1	0	0	0	1	1	0	0	1	0	1	0	0	0	0	1	0	0	0	1	0	0	1	0	0	1	0	0	0	1	0	0	1	0	0	1	0	1	0	1	1	1	0	0	1	0
ÇNB19	0	0	0	1	0	1	0	1	0	0	1	1	0	1	0	1	0	0	1	0	0	1	0	1	0	0	0	1	0	0	0	1	1	0	0	0	0	1	1	0	1	0	0	1	0	0	0	1	0
ÇNB 31	0	0	1	0	0	1	1	1	0	0	0	0	1	1	0	1	0	1	0	0	0	1	0	1	0	0	0	0	1	0	1	0	0	0	0	1	0	1	1	0	1	0	0	1	1	0	1	1	0
ÇNB18	1	1	0	0	0	1	0	1	1	0	0	0	1	0	0	1	0	0	0	0	0	1	0	1	0	0	0	1	0	0	1	0	0	0	0	0	0	1	0	0	0	0	1	0	1	0	0	1	0
ÇNB32	1	1	0	0	0	1	0	1	1	0	0	1	0	0	0	0	1	0	1	1	0	0	1	1	0	0	0	1	0	0	0	1	0	1	0	1	0	1	1	0	1	0	0	1	1	0	0	1	0
ÇNB 33	1	1	0	0	0	1	0	1	1	0	0	0	1	0	0	1	1	0	0	1	0	0	1	1	0	0	0	1	0	0	0	1	0	1	0	1	0	1	1	1	0	0	0	1	1	0	1	1	0
ÇNB47	1	1	0	1	0	1	0	1	1	0	0	0	1	1	0	0	0	0	1	1	0	0	1	1	0	1	0	1	0	0	1	0	0	0	0	1	0	1	0	1	1	0	0	1	1	0	0	1	0
ÇNB25(A)	0	1	0	0	0	1	0	1	1	0	0	1	0	1	0	0	0	0	0	1	0	1	0	1	0	0	0	1	0	0	1	0	0	0	0	1	0	1	1	1	1	0	0	1	1	0	0	1	0
ÇNB36(A)	1	1	0	0	0	1	1	1	0	0	0	1	0	0	0	1	1	0	0	1	0	0	1	1	0	0	0	1	0	0	1	0	0	0	0	1	0	1	0	1	1	0	0	1	0	0	0	1	0
ÇNB42	1	1	0	0	0	1	0	1	1	0	1	0	0	0	0	0	1	1	0	0	0	1	0	1	0	0	0	1	0	0	0	1	0	1	0	1	0	1	0	1	1	0	0	1	1	0	1	1	0
ÇNB35	1	1	0	0	0	1	0	1	1	0	1	0	1	1	0	1	0	0	0	0	0	1	0	1	0	0	0	1	0	0	0	1	1	0	0	1	0	1	0	0	0	0	1	0	1	0	0	1	1
ÇNB43	1	0	0	0	0	1	0	1	1	0	0	0	1	1	0	1	0	0	0	1	0	1	0	1	0	0	0	1	0	0	0	1	1	0	0	1	0	1	0	1	1	0	0	1	1	0	0	1	1
ÇNB46	1	0	1	0	0	1	0	1	1	0	0	0	1	1	0	1	0	0	0	0	0	1	0	1	0	0	0	1	0		0	1	1	0	0	1	0	1	0	1	1	0	0	1	0	0	0	1	0
ÇNB24	1	1	0	0	0	1	0	1	1	0	0	0	1	1	0	1	0	0	0	1	0	1	0	1	0	0	0	1	0	0	1	0	0	0	0	1	0	1	1	1	0	0	0	1	0	0	0	1	0
ÇNB56(A)	0	1	0	0	0	1	0	0	1	0	0	0	0	0	0	1	1	0	0	0	0	1	0	1	0	0	0	1	0	0	1	0	0	0	0	0	0	1	0	1	1	0	0	0	1	0	0	1	0
ÇNB55	1	0	1	0	0	1	0	0	0	0	0	0	0	0	0	0	1	0	0	1	1	0	1	0	0	1	1	1	0	0	0	1	1	0	1	0	0	1	1	1	0	0	0	0	1	0	0	1	1
ÇNB27	1	1	0	0	0	1	0	1	1	0	0	1	0	1	1	0	0	0	1	1	1	0	1	0	0	0	1	1	0	0	1	0	0	0	1	0	1	1	0	0	0	0	1	0	1	0	1	1	0
ÇNB52	1	0	1	0	0	1	0	1	1	0	0	1	0	1	0	0	0	0	1	1	0	0	1	1	0	0	0	0	1	0	0	1	1	0	1	0	1	0	0	0	0	0	1	0	0	1	1	0	1
NNA125	1	0	1	0	0	1	0	1	1	0	0	1	0	1	0	1	0	0	0	1	0	0	0	1	0	0	0	1	0	0	1	0	0	0	1	0	0	1	0	1	0	0	1	0	1	0	0	1	0
ÇNB35	0	1	0	0	1	1	0	1	1	0	1	0	1	1	1	1	0	1	0	0	0	0	0	1	0	0	0	1	0	0	0	1	0	1	0	0	0	1	0	1	1	0	0	1	1	0	0	1	0
ÇNA10	1	1	0	0	1	0	1	1	0	0	1	0	1	1	1	0	0	1	0	1	0	0	1	0	0	0	1	1	0	0	1	0	0	0	0	0	0	1	0	1	1	0	0	0	1	0	0	1	0
ÇNA7	0	1	0	0	0	1	0	1	1	0	1	0	1	1	1	1	0	1	0	0	0	1	0	1	0	0	0	1	0	0	0	1	0	1	0	1	0	1	0	1	1	0	0	0	1	0	0	1	0
ÇNA4	0	1	0	0	0	1	0	1	1	0	0	1	0	0	0	1	1	0	0	1	0	0	1	1	0	0	0	1	0	0	0	1	1	0	0	1	0	1	1	1	0	0	0	0	1	0	0	1	0
ÇNB37	0	1	0	0	0	1	0	1	1	0	1	1	0	1	0	0	0	0	1	1	1	0	1	1	0	0	0	1	0	0	0	1	0	1	0	0	0	1	0	0	0	1	0	0	1	0	0	1	0
SNA134	0	1	0	0	0	1	1	1	0	0	0	0	1	1	0	0	0	1	0	1	0	1	0	1	0	0	0	1	0	0	0	1	1	0	0	1	0	1	0	1	1	0	0	1	1	0	0	1	0
NNA124	1	1	0	0	0	1	0	1	1	0	0	0	1	0	0	0	1	0	0	1	1	0	1	1	0	0	0	1	0	0	0	1	0	1	0	1	0	1	0	1	1	0	0	0	1	0	0	1	0
NNA126	1	0	1	0	0	1	0	1	1	0	0	1	0	1	0	0	0	0	0	1	1	0	1	0	0	1	1	1	0	0	0	1	0	1	0	0	0	1	1	1	0	0	0	1	1	0	0	1	0
ÇNA8	1	1	0	0	0	1	0	1	1	0	0	0	1	1	0	1	0	0	1	1	0	0	1	1	1	0	0	1	0	0	0	1	1	0	0	0	0	1	0	1	1	0	0	0	1	0	0	1	0
ÇNB44	1	0	1	0	0	1	0	1	1	0	0	1	0	1	0	0	0	1	0	1	0	1	0	1	0	0	0	1	0	0	0	1	1	0	0	0	0	1	0	1	1	0	0	0	0	0	0	1	0
ÇNA13	0	0	1	0	0	1	0	1	1	0	0	0	1	0	0	0	1	0	0	1	1	0	1	1	0	0	0	1	0	0	0	1	0	1	0	0	0	1	1	1	0	0	0	1	1	0	0	1	0
ÇNB54	1	0	1	0	0	1	0	1	1	0	1	1	0	1	0	0	0	1	0	1	0	1	0	1	0	0	0	0	1	0	0	1	1	0	0	0	1	1	0	1	0	1	0	0	0	0	1	0	1
ÇNB51	1	0	1	0	0	1	0	1	1	0	1	0	1	1	0	0	0	0	1	1	1	0	0	1	0	1	0	1	0	0	0	1	0	1	0	0	0	1	1	1	0	0	0	0	1	0	0	1	0
ÇNB58	0	0	1	0	0	1	0	1	1	0	0	1	0	1	1	0	0	0	1	1	1	0	1	1	0	0	0	0	1	1	0	0	0	0	0	1	0	0	0	1	1	0	0	1	1	0	0	1	1
ÇNB50(A(	1	1	0	0	0	1	0	1	1	0	0	1	0	1	0	1	0	0	0	1	0	0	1	1	0	0	0	1	0	0	0	1	1	0	0	1	0	1	0	1	1	0	0	0	1	0	0	1	1
ÇNA6	0	1	0	0	0	1	0	1	1	0	0	1	0	1	0	0	0	0	1	1	0	0	1	1	0	0	0	0	1	0	0	1	1	0	0	1	0	1	1	1	0	0	0	0	1	0	0	1	0
ÇNA9	1	0	1	0	1	0	0	1	1	0	0	1	0	1	0	0	0	0	1	1	0	0	1	0	0	1	1	1	0	0	1	0	0	0	0	1	0	1	1	1	0	0	0	0	1	0	0	1	0
ÇNB22	1	0	1	1	0	0	0	1	1	0	0	0	1	1	0	0	0	0	1	1	0	1	0	1	0	0	0	1	0	0	1	0	0	0	0	1	0	1	1	1	0	0	0	1	1	0	1	0	0
ÇNB62(A)	1	0	1	0	0	1	0	1	1	0	0	1	0	1	0	0	0	0	1	1	0	0	1	1	0	0	0	0	1	0	0	1	0	1	0	0	1	1	1	1	0	1	0	0	0	1	0	1	1
ÇNB57	1	1	0	0	1	0	1	1	0	0	0	1	0	1	0	1	0	0	0	1	0	1	0	1	0	0	0	1	0	1	0	0	0	0	0	1	0	1	0	1	1	0	0	1	0	0	0	1	1
ÇNB34(A)	0	1	0	0	0	1	0	1	1	0	0	0	1	1	0	1	0	0	0	1	0	1	0	1	0	1	0	1	0	0	0	1	1	0	0	0	0	1	0	1	1	0	0	1	1	0	0	1	0
NNA102	1	0	1	0	0	1	0	1	1	0	0	1	0	1	0	0	0	1	0	0	1	0	0	0	0	1	1	1	0	0	1	0	0	0	0	0	0	1	0	1	1	0	0	0	1	0	0	1	0
NNA128	1	1	0	0	0	1	0	1	1	0	0	1	0	1	0	1	0	0	0	1	0	0	1	1	0	0	0	0	1	1	0	0	0	0	0	1	0	1	0	1	1	0	0	1	0	0	0	1	0
ÇNA5	0	1	0	0	0	1	0	1	1	0	1	0	1	0	0	1	1	0	0	1	0	0	1	1	0	1	0	0	1	0	0	1	1	0	0	1	0	1	0	1	1	0	1	1	1	0	0	1	1
ÇNA11	1	0	1	0	1	0	0	1	1	0	0	0	1	0	0	1	1	0	0	1	0	0	1	0	0	1	1	1	0	1	0	0	0	0	0	0	0	1	0	1	1	0	0	1	1	0	0	1	0
ÇNA3	1	1	0	0	1	0	0	1	1	0	1	0	1	1	0	1	0	0	0	1	0	1	0	1	0	0	0	0	1	0	0	1	1	0	0	0	0	1	0	1	1	0	0	1	1	0	0	1	0
NNA122	1	1	0	0	0	1	0	1	1	0	0	1	0	0	0	0	1	0	1	1	0	0	1	0	0	0	1	1	0	0	0	1	1	0	0	0	0	1	0	1	0	0	1	0	1	0	0	1	0
NNA127(B)	1	1	0	0	0	1	0	1	1	0	0	0	1	0	0	1	1	0	0	1	0	1	0	1	0	1	0	0	1	0	0	1	1	0	0	0	0	1	1	1	0	0	0	0	1	0	0	1	0
SNB69	1	1	0	0	0	1	0	1	1	0	0	0	1	0	0	0	1	0	0	1	1	1	0	1	0	1	0	1	0	0	1	0	0	0	0	1	0	1	1	1	0	0	0	1	1	0	0	1	0
NNA130(B)	1	1	0	0	0	1	0	1	1	0	0	1	0	1	0	1	0	0	0	1	0	0	1	1	0	1	0	0	1	0	0	1	1	0	0	1	0	1	1	1	0	0	0	0	1	0	0	1	0
SNB70	1	1	0	0	0	1	0	1	1	0	0	0	1	0	0	1	1	0	0	1	0	1	0	1	0	0	0	1	0	0	0	1	1	0	0	1	0	1	0	1	0	1	0	1	1	0	0	1	1
ÇNB53(A)	0	0	1	0	0	1	0	1	1	0	0	0	1	0	0	0	1	0	1	1	0	0	1	1	0	1	0	1	0	0	0	1	0	1	0	1	0	1	1	1	0	0	0	1	0	0	0	1	1
ÇNB45	1	0	1	0	1	1	0	1	1	0	1	0	1	1	0	1	0	1	0	0	0	1	0	1	0	1	0	1	0	0	1	0	0	0	0	0	0	1	1	1	0	0	0	0	0	0	0	1	0
ÇNB49(A)	0	0	1	0	0	1	0	1	1	0	0	0	1	0	0	1	1	0	0	1	0	1	0	1	0	0	0	1	0	1	0	0	0	0	0	1	0	1	0	1	1	0	0	1	0	0	0	1	0
ÇNA2	0	1	0	0	0	1	0	1	1	0	0	1	0	1	0	0	0	1	0	1	0	0	1	1	0	0	0	0	1	0	0	1	1	0	0	1	0	1	0	1	1	0	0	1	1	0	0	1	0
ÇNB26	1	1	0	0	1	0	0	1	1	0	1	0	1	1	0	0	0	0	0	1	1	1	0	1	0	0	0	1	0	1	0	0	0	0	0	1	0	1	1	1	0	0	0	0	0	0	0	1	0
SNB60	1	1	0	0	0	1	0	1	1	0	0	1	0	1	0	1	0	0	0	1	0	1	0	1	0	0	0	1	0	1	0	0		0	0	0	0	1	1	1	0	0	0	1	1	0	0	1	1
SNB74	1	1	0	0	0	1	0	1	1	0	0	0	1	0	0	0	1	0	0	1	1	1	0	1	0	0	0	1	0	0	1	0	0	0	0	1	0	1	1	1	0	0	0	1	0	0	0	1	0
SNB65	1	0	1	0	1	0	0	1	1	0	0	1	0	1	0	1	0	0	0	1	0	1	0	1	0	1	0	1	0	0	0	1	1	0	0	1	0	1	1	1	0	0	0	0	1	0	0	1	0
ÇNB59	1	1	0	0	1	0	0	1	1	0	0	0	1	0	0	0	1	0	0	0	1	1	0	1	0	0	0	1	0	0	0	1	0	1	0	0	0	1	0	1	1	0	0	1	1	0	0	1	1
SNB71	1	0	1	0	0	1	0	1	1	0	0	1	0	1	0	1	0	0	0	1	0	1	0	1	0	0	0	0	1	0	0	1	0	1	0	0	0	1	1	0	0	0	0	0	1	0	0	1	0
SNB73	1	0	1	0	0	1	0	1	1	0	0	0	1	0	0	0	1	0	1	1	0	1	0	1	0	0	0	1	0	0	0	1	0	1	0	1	0	1	1	1	0	0	0	1	1	0	0	1	0
SNB72(A)	1	1	0	0	0	1	0	1	1	0	0	1	0	1	0	0	0	0	1	1	0	0	1	1	0	0	0	1	0	1	0	0	0	0	0	1	0	1	0	1	0	1	0	0	0	0	0	1	0
SNB66	1	1	0	0	0	1	0	1	1	0	0	0	1	1	0	1	0	0	0	1	0	1	0	1	0	0	0	1	0	1	0	0	0	0	0	1	0	1	1	1	0	0	0	1	1	0	0	1	0
SNA14	1	1	0	0	1	0	0	1	1	0	0	1	0	1	0	1	0	0	0	1	0	1	0	1	0	1	0	1	0	1	0	0	0	0	0	0	0	1	1	0	0	0	0	1	1	0	0	1	1
SNB63	1	1	0	0	0	1	0	1	1	0	1	1	0	1	0	0	0	1	0	0	0	1	0	1	0	0	0	1	0	0	1	0	0	0	0	1	0	1	1	0	0	0	0	1	0	0	0	1	0
SNB75	1	0	1	0	1	0	1	1	0	0	0	0	1	0	0	1	1	0	0	1	0	1	0	1	0	0	0	1	0	1	0	0	0	0	0	1	0	1	1	0	0	0	0	1	1	0	0	1	0
SNA17(B)	0	1	0	0	1	0	0	1	1	0	0	1	0	1	0	1	0	0	0	1	0	1	0	1	0	0	0	0	1	0	1	0	0	0	0	1	0	1	1	0	0	0	0	1	1	0	0	1	0
SNA16(B)	1	0	1	0	1	0	0	1	1	0	0	0	1	1	0	1	0	0	0	1	0	1	0	1	0	1	0	1	0	1	0	0	0	0	1	1	0	1	1	0	0	0	0	1	1	0	0	1	0
ÇNB48	1	0	1	0	0	1	0	1	1	1	0	1	0	1	0	0	0	0	1	1	0	0	1	1	0	1	0	1	0	0	0	1	1	0	0	1	0	1	0	1	1	0	0	1	1	0	0	1	0
SNA15	1	0	1	0	0	1	0	1	1	0	1	0	1	0	0	1	1	0	0	0	0	0	1	1	1	0	0	0	1	1	0	0	0	0	0	1	0	1	0	1	1	0	0	1	1	0	0	1	0
ÇNA1	1	0	1	0	0	1	1	1	0	0	0	0	1	1	0	1	0	0	0	1	0	1	0	1	0	0	0	1	0	0	0	1	1	0	0	1	0	1	0	1	1	0	0	1	0	0	0	1	1
ÇNB40	1	0	1	0	0	1	0	1	1	0	1	0	1	0	0	0	1	0	1	0	0	1	0	1	0	0	0	1	0	0	0	1	0	1	0	1	0	1	0	0	0	1	0	0	1	0	1	0	1
ÇNA12	1	0	1	0	0	1	0	1	1	0	0	1	0	0	0	1	1	0	0	1	0	1	0	1	0	0	0	1	0	1	0	0	0	0	0	1	0	1	1	1	0	0	0	1	1	0	0	1	1
NNA123	1	1	0	0	1	0	0	1	1	0	1	0	1	0	1	0	1	1	0	0	0	1	0	1	0	1	0	1	0	0	1	0	0	0	0	0	0	1	0	1	1	0	0	1	0	0	0	1	0
ÇNB41	1	1	0	0	0	1	0	1	1	0	0	0	1	1	0	0	1	0	1	1	0	0	1	1	0	0	0	0	1	0	0	1	0	1	0	1	0	1	1	1	0	0	0	0	0	0	0	1	0
ÇNB21	1	0	1	0	1	0	1	0	0	0	0	1	0	0	0	0	1	1	0	1	0	1	0	1	0	0	0	1	0	0	0	1	1	0	0	1	0	1	0	1	0	0	0	1	1	0	0	1	0
[truncated: 34 more columns]
